# Supplementary material for: Molecular barcoding of native RNAs using nanopore sequencing and deep learning
Source: PubMed Central journal article supplement — Genome Res. 2020 Sep;30(9):1345–53. doi: 10.1101/gr.260836.120 (PMC7545146; doi:10.1101/gr.260836.120), 2020-09
Supplement: supp_gr.260836.120_Supplemental_S1.pdf [file supp_gr.260836.120_Supplemental_S1.pdf]

## Reference synthetic transcripts

### a) Sequins

>Sequin\_R2\_117 (1039bp)

```
AAAATTACGAGTCAATGAGAATCGATCAGGAGGAAAGGGCCTTCCCAGTACATGGCTCATCATGAT
TAAATTGTATAATATTACATTAATGTGCTCGGGTTGCTACATCCCAATAATGCCATATAACTAGTC
GCCGTTCCGCACTTTAACTTTTGGCTTCTACTATAAAGCCATTTGAGACTCCATCTTTACGTCACGT
TATGACGGCGTCCATTACTTGCTTTGGGTGAACCGCGGATTTCTGTCACTTCAACTTTATGCGAGT
CGCACCTTGTCACTTATGCCGTACTTTTAGTTCGTTTCGCCTATCAGAAAGGGGTATTTGTGCATAA
CCTTATGTTCTTGTGCTGATGCACTACTTAGATTTACGCCTGACGAGGGGGTATAAAACAGATTT
TAATATGGCGCATTCTGCCTACACGCTAATCGAGCGTAAACGAGCGATGACCTGCTTTTTCCTTATC
GAAAGACAACAATAAGGTAAGTTCAACAATAATCACTACAGTATACTGATCGAGCTTGAACCACGC
ATCTCTCTACAGTTTTCGGCGCGGATTAGAAAACAAGGACTCGGTAGGGGATAGGGTGAGTAATGA
TATGAAAACAGGTGGATAACCAGATCGGAGGAAGAGTCAATTTAGCCTTTGACAGTGCCTTCATGTG
ATTAGATTTCTAGAATAAATATTCGATCGTAAACGAACCCCAATAGATATAGTGCAGTACGTTAAA
TTATCCTTGTATAGCGTATATAACAAGAAATATCTTTGAGATGTGAGTCGTTTTTCTCGTTGAGCGG
CTGACTTTAGGTGCTATTGTTTATGAGGTTTGTTCCTCCCACTTTAGCTAGTGAACTTTTTGGTA
GCACCATGCCAGTCCAGCCATTAGCCTATAAATGTCGTTGCGGCTCGAGAATAGATAATGGGATAT
ATCAAAATTACAAAGCAAAGCATACTGTAGGCCTGATACGACTTAAAAGATCAAGCAGGGTGGTGA
AACATTGGTCACTTAGCACGCTAGTTACACGATATACCGAACTGTGAAG
```

>Sequin\_R2\_63 (712bp)

```
TGCAGTAGGATACGAATCGTTAAACATACTCGTCCAAAACATATCTAACCAAACATCAATGCCTGG
TATCTGTAAAACGGATATTGCATAGTTCTGGCTGTTTATTATTTGTCATGATTCGCAAGAACTACC
TCATGAAACTCCGCGGCGATAGTTTTAAATTACAGTCTACTGCTGAGAGGATATTTTCATCATGCC
CCGGGCGGGGTCATTTAATGCGCTCGGGCCTGCTGTATTATCCTCGAATATATGCGATGTATTAA
GGTTAAAGAGGGACAAAACACTATCATAAATTAGTATAATTTGGTCAGCGTGCATTTTCAGTATTTGA
ATACATTACTAATTTTCTAAAATAACTGTATGCGTCAACGAACTGTCATGGATGTGCTGTCCCCTA
TTGTGACTAGGTTTCTTAGGGCAATTTCTGCCTTTTAGTTTTAACTTGCATACTCTAAATGACAAGT
ATTGAAAAAAGACAGTCCCTCAATCTAGTGACACCTATTGTATTTTAAAAACTATTCATATAAACTG
CGCGAGTGAACATAATGTTATTGCGGTTTAGATTGGGAACGAATTAAGTAGTACAAATCCTTTTGA
TTATATCAAACGGAGTTCTAATCGGTTAACTGTACCTTTGTTTCATCTGCTTAGGCTAACATCAA
TCCAGCCTAGACAAGAAATTGTGGCGAACTACGAGAGTATTGCCCATTCGG
```

>Sequin\_R1\_103 (1754bp)

```
CACCTCTGCGCAAAGGCGGGTACTGAAAAACATAGGGTCTCATATATCTTGTAGTTGTTTCGTGT
ATGATATTATTATGATTTTTTATAACACATCTTCTAGATTTTTGTAACAGAGATCCATGAGAGAAAT
ATACTAGGTCCACATAATTCTGAGCGAGACTACATGGGCATCCGACGAGCCACAATAGAGACATCA
GGCTCGCTGGGCTCCCCCGTCCGCCACCCTTCAACGAGGACCGGACTTGCTGGATCGCACCCCTCC
TTGTATTTCCCGCCGTAGTAAGCCCGATGTTCCATGGCCTCAAGCTCTTCCATCGTGGCCCCCGCC
TTCCACTAGGAGAGAAGCCGATTCAAGAACCCGACGAGGTCGTGTGCCCTGACGACGAACACATTCG
AGATTGCCCCACGGGCAATGTACTTCATCCCGGTGTCCCCCGGTGATAGGAGCCGGTGCACAATCC
TCGACGCGTACACGCCATCGGGCCCCCGGCCGGAGAGCAGACAGGGACGTGGAGGGGTGCCGGTGA
CGTGGGACACACGCATGAAAAGGAACAGTTATAGAGGTGTGCTACTTAACTACCCGACAAACTCCG
GCGAGCGCACCGTTCCGCCTGCAATGCCCGGTACTAACAGGGCCGGGCACTGCTACACCAGGCGGG
TCCGCTTCCCCAGAGCCTTAGAAGCAGCTCGGGTCTACGCCGAAGCATTGGTGCGGGCAAATCCTG
```

GTGCGCCGCCTTTTCCGATAAGAGGCCGGCTTCAGGCCAGTCGAGATTTTGAGAGTAGGTGAGCAG  
AGATCGTCAAACGTGTTGAAGCCAACACGATTATGTTGCGCACTCGTCGTGCTAGCCCCCGTCGT  
CCTTGCCACGTCACAGGTGGCGGTGCGGCCTACCCGCTAAAGAGCGCAAGAGCCGACGCCAGAAG  
GGGATGCTACCCGGAGCACCAGTATGCGGCCGAGCGCGCTGGAGCAGGCCACGCGATAAGGATCA  
CAGCTAGCGCCGAATCCTCCATCTAACCATATGGGGATAGTCGCGCCGTAGAAAACCTCTGCCAGGG  
CAGAGGGATTTCGCTATATACTGAATACCCACCATGCCTGTATGAGCCTACGAACAGTCAACACAA  
AAGCGCAAGTCGTGCCCTACACAAACTAAGGCGTCGGTGACTCGGATCATAATGGATGAGTTAACC  
AGCGGATATCCTTGGGGATGATTATCAGACGATCAGGGAATTTACCTACAGAGGACTCGGGATCCC  
TGGGCCACTGTCATACGACCCAAGGTTGGCCTCGACGTCGCGCCCTAAGAAGACCCCCAAGGATTA  
GATCGATCGACCGGATCTTTCCACGATCCTGTTTTACGCCTCTCTGAACGCCGTGGCGTAGCTTGG  
GCGACATTCAGGAACTCAGCTAACGGCCACATGTCCGTTTAGCAACCTCCCTAAGTGCCCATGGTA  
TCCAATGACGCTGCGACCCGTCATTGGGTTCAACACACGCCCAGCACCATTTATAGCGGTTACGTCC  
AGAGCCCCCACAGCGGAACGGAGCCTCTAAATGCTAGAAAACCTCAACTCCCTCCTGTGAGGGGCC  
GGGGCGGCAGCGGGGATTCTGCATCAGGTCGCGCGGAGGGACACTGGCGTGGGCCCCGAAGCCGT  
CCTGCGTTTTCTCTACTCCGAACGGACCCGACCGCTGGTTCGGAGTCGGTCGGTAGTGGCCCCGGT  
GCACTCGACTGGCGCGTGGTGATTGGGGCTATCAGTG

> Sequin\_R1\_81 (1651bp)

GCAGGTCTGCACGGATACGGCGGGGACGTAGGGGTATACGCGGCCTTGGCCCCGCCAAGGCCTTCG  
TCCATTCCGCGGCCCCCTGGCGTGTGCCCCGAGGCTCCCCAGCTAGCACACCCGGGGGTGCGCCCTTG  
CCGAGGCTAGGTGTGCACCAGAGCTGTGATTCTGTGAGTGCGATGCCGCCGGGGCGGACTTGCGTCA  
GCGGATTACACATCTCGCCGTTGCGGGTTCGGAACCACGTTTCAATAGCAGGGAACCTGGCCTTGGG  
ACACATGGACATTCGCCAGACCGACTGGGTTGCGTGTAGTGCGGTCCCTGGCCGAAAGGTTTGG  
GGACACACAGTGGGCGCTCTAAGTTTGCAGCTCGCTGTGAGGAGCATCGTGGCCTCCGTGCAACGG  
GAGATGACAGCATCGGGGCCGTGGCAGTTAATAGCCCACGGAAGGTCGTAACCGGGTTCGGTAA  
CGATTCAGAGACGCCCGGGGTGCGCGGAGCAGCGTCCGTCCGTGGACCCATCCGCGCATTCGAGGA  
TTACAGGTCCGGCGCCTAAATGGTGCGAAGTCCCGCTCTTTCGGGGTGTGATCGCGCCTTGATAC  
CTCTCCACGCTCGCCACCGAGCGAAAGGAACTCACGTGACCGTGTGCGAGTCCGAACCCGCGACCA  
GGCAAACGCTAGCGATTATCGGTTGCGATCCACCGACCCGTAAGCGGGGGTTCGACGCGGTCCC  
CGGCCAATGCCGTGCACCGCCCATGTATTCTGTGGAGCGCTGTTGGATGCCGGGGGGTCAATGGGCC  
CAGCGTACCCGTAGTGTGTTGGTCCGCAGGCACCAACTTACGTAAGAACCCTTAATTGTCTTT  
GGCCCGTCCCAGGCCAGCGCAGCGCCGTGACTTTCAATGTGTGGACCCGTTTTTACCCGGGTACCG  
TTTTCCAGACGCCCCGCAATTACGGCGTCCATATCGGATGGGTCTATCTAGTGTGTTCCGCGCCGA  
GCACGGGGCGGCAAGTCCGGACCGTCGCGGATGACGCGATTGTGGGCAACTACGGCTAGCGTGAGT  
AGGTGGAGCTTGAAAAATTACGGCGCGTGTGACCTCCTGCGGCATCCGACTTCATGACACGCGC  
CTCTGAACGCTCCGTTTGGGGCGCTCTACAAGCGGGTAAACTACAGTGATGGTGGAAACCCTGACTG  
GACAGGTCCGGGCAATCCGCTCGCGAACCAGTGGTGGTAAGGTCAGGGGACGTCGGGCTACCGTGG  
GGGTCACACGGCCCAGCTCTGATGCGGGACCGCCAGGGATGGGAATGTGGAGGACCAGGCCCCAGC  
GGGGGGTCCGTATCAGCTGTTAGAACGCGGTGCGCGGTGGATGTTTAGGGATTTTGTACGCGGAG  
GGCCGCGTTCCTAGGAGCATCGGGGGTCCAGGGGGCAACGCCTGACCACTCCTGGTAGCGTGCTTC  
GGCCGAGGGACGACGAGTCCCAACACGTGACGCTCTTGAACCTTCCACTAGTCCCTAACAACGCC  
GTCTTTGCCGAGGGTGGACCTAAGTGACCCGCGCGCAAAGAAGGGTTAGGCTAAGTCAACTCCGCG  
CTCCCCGCACTCGTTATTGGCAGCGCGTCTTCAATTACGGGCCGGGGGAGTAATTGTATATGCATA  
C

## b) Curlicakes

> Curlcake\_CC1 (2244bp)

ATCATAATTAATACGACTCACTATAGGGAGATCCGGCTGTGGAAGTCGATGAATCAAAAACCTTGG  
ACCCTATCTCACAACGAACGAGTAATCCTGCGTGGGACTACAAAGTCGTTTTTCGTGGACCAGGCCT  
CGACCTCCCAAGCATATGGGGACGTCGCTCAAATCCACAGTAGACTATCTATTAACATAATTGTGGA  
TCGATGCTGACGCTACCCAGGTCTAGTTCGAGCCAATAATGTGCTACGTCGCGAAAGCCAAACAAC  
GCTAACACCCTATCGTTCATTTGATACGTAACATCAATCACCTTGCAACTAGCTCGAACGGTATGG  
TTCAACGAGGGTGTTAGGCAGCGAACAACCCAGAGCGTTTATCATAACCATATGCTCAACATACTTC  
CAGAGAGTCTGTTGGTCTAACAAGGTATAGCGGCGAGCAACGGAAAAGATAGTGCCTAATAGTTCC  
AGGAGCACCGCATCCCCCTCGCCGTTTTTCGGGCCGTTAATATGGGCCGTAACACACCCGGAGTTTCA  
TAAAACGGCCTTTCCGTTGCTCGGGTGAGGGCATACTGCTGCCTGGAGGGTATCCTACATGGTTA  
AATGCTGCGCCCCGTTAGGAAGCAGCAAATAAGAGTCTACCCGGTCTACCCGGTACAAAGTTTCGTGA  
GAGTTCTTCATGCTCGTCTCATAAAGGACTGGCAAAGGCCTTTGTTGCGTCAATGAGGAAGCCAAG  
CGGCGAGGTCAAGGCCACGAGTACATGGGCCATTCTCCAGTATAGTGAAATAAGCCCACGCGGTAA  
ACCAAATGTGGAGCACACTCCACGTTCCCTGTTTCGTGGGCCTATTGGGATATGTCTTTATCAGACAA  
CCTTATTTACGCGTATACATGCGGCAGTAGGCCTCGCGGTCCTAAGGGTCAGGTGTTACCACTTAC  
CTCAATTTTCTCTGGAGTAGTACTTAGACTACCATCTTTGTTGAGAAATCATCTCACCTCTCTAGT  
CAGGGATAGCGTCCACTGTCTAATTATACAACTATTTCGATCAAGGTCGCAAGTGGATACTGAAAAT  
CACTATGTAGAGCTTCGGAAAGCCTGAATTTTAAGTTATATCCTAAGAGCAGTGAACATTTCCAGC  
GATTTCCGTTAGTTCGAATGTCAAACCCCGATCTAGGGTTAGAGTGCCTAGGTGCTATCCACGTGGT  
GTCCCTGGGAGGCTACCTTTCGTGGACATAACTCGGCAGACACTAGTCCGATCGCCAGGACAAAAA  
TCAGCGACGAACCGGTGAATCTTAAGCGAAATAGACGAGAAGTTTAGGCATGTTAAAGCGGGTGC  
CCGGCACTGGCGGAGTAACGTTCCCTCCTCCATATCTATAACCAACCCCGAACCAGGAAGTGGG  
ACTGGAGAGGTTTGGGTATCTTCAAATTTGTGCATTACTGTTGGAAAGGTTGGATGCTTCGCGCAA  
TATCGATAACCGATCTACTTGCCTGAGCGCAAATTCGCGTAGCAAATAGTGACCCATCGCGGCCAT  
CAATGCTGACAGGGAGCACAACCAGATCACGATAACTTGTAAAGGGGGTATAGCAGCTCACCCGGAG  
GGAAATACTGCAATCATGGAGTCGTAACAGGGCCATGTCAACATCGTACGCGTTCGTCAATCTA  
GGTATTTATTCAAGGGGATAGAAGCGTGGAGTTATTGAATCCAAACCCAAGCCGCTGCAGCGAGGG  
CTACCACCCACGAGATCGGATGGTAGGGGGCGCCGTTGGGTAGGGGGCCCTGGGTATCACAAAAG  
ATCGCACTCTTCCCTGGGCTTATGCGATACATCACCGGGAAATGATGCCACGTACCAGGATCGTTAC  
GGGACCACGTGCAAGGCGCAGCAGCGAAGTGTGCTCTAGTATGTTTGTGAGTAGCACGGGTGACG  
TTTATGCGTTCTCTTTCCCTCCTAGATGGCAGCCTCCCCAATGATGGGAAGGACTTTTATCGACATG  
TGAACCGGCCCTAACGAGACAGGTCTTGGTCTTGGTATCGAGCAAGTATAACCAATTTCTTCACTC  
GCAGAAAAATGTTGACGAGGAGCAATTCTCTATTAACGCACGGTCTGCTATTTTCGGGCCGGAGTCA  
AAGCTCGTATATCGTGACCTCTTGGGGATCGTGTCCCCGCTTGTGAATGTAGGCTCGCGGCCAACC  
CTCGTTACTATACGACGGGAGTGGGGAGTACGACATCAATAAAATAAGCAAACACAGCTCAAGATGC  
GACCTAGCCAATGATTTTAGGCGATCATTG

>Curlcake\_CC2 (2459bp)

ATCATAATTAATACGACTCACTATAGGGAGACAGAAGCGGATTATGGGGGCGCCATTATCGCGCGC  
GTGCTACCCTGAATGATACAGAGCGTGTGTCCACGTGAGCTGTTGCGTAAGTCGTCAGCATACTG  
CCCTTGGACCGTGCATATTCCTCAGTCACTACTTTCTAGACTCAATATCTTTTCGATGCTCCCGTGC  
ATCAAGTAACTCGCTGTCTCGCTCTGTGAGAGCAATAGCGCCTCGAGCTAAATGCCGACGCAAGGG  
GAATCATAGGAAAAGCCAGCAAAGCCCCTAAAAAACGAGCATGGCTGTCATCGCTTGGGAGATTC  
GGGACTTAACAACGTCAGGCTAAGGGTAAAGGTTGGCCGTGTTAACCAGTTGCTCGGTCATGTCTC  
CGCTACCTGTGATCATATCGAAAACATAATAGCTAACTTGCCCGCAGATGGGCCGTGTGAAGCTGG

TAGCCGACCCCACGGCCTTACCGGACACGCCCGGACCCCCGACACTCGTAGTAAAATTGATACATC  
GCGTTAATCGTGGGGCTGGCGCGTGGCAGCGTTCTTGACATGTGTGGGTATGTAAAGTATAACAAC  
CCTTGCGGCGTTGGCACGGCCCTAAGCTGAGAAAAAAGGTGCTCATAACTCAAACCTCGACGTTCC  
CCGTGGGTGGCGATAGGCATTGGTATGGTTTGGTCTTCTGCAAGTCGCCCAGGATGTGATCAATGT  
AACGAAAAGGAATGATAGTAAAAAGATCCGGCTGTGGAAGTCGATGAATCAAAAATCTTGGACCCT  
ATCTCACAAACGAACGAGTAATCCTGCGTGGGACTACAAAGTCATTTTCGTGGACGAGCCCTCGACC  
TCCCAAGCATATGGGGACGTGCGTCAAACCCACAGTAGACTATCAACTAACTATTGTGGCTCGAAG  
CTGACGCTACCCAAATCAGGTTTCGAGCAAATAATGTGCTACGTCTCGAGAAACAACCCGAACACCC  
TGTCGTTTCAATTGGATACGTAACATCAATCACCTTGCAACTGCTCGCGGTATGGTTCAACGTGGTTG  
TTAGGCAGCGAACACCCGGAGCGTTTATCACGCCATATCCTTAACAAGCCTCCAGAGAGTCTGTT  
GGTCTAACACTGTATAGCGGCGAGCGACGAAAAGGTAGTGCGTAAAAGTGGATTAGCACCGCATC  
CCCCCTCTCCGTTTTTCTGGCCGTTAATATGTGTGCGAACAGACCGGATTTTCATCACACGGCCTTTCC  
GTGCTGGGGTGAGGGCATAACGAGATGCCTGGAGGGTATACTACTTGGGTAAATGCTGCGACCCGTA  
GGAAGCGGAATAAAAATGTCCCCGGTCTCATGTACAATGTTTCGCGGAGTGTCTATGCTCAGCTCA  
TCCGTCACACTGACTAAAGCCATTGCTGAGTCCATGAGGTAATAACGCGGCTCCGACAAGTCCCTAAT  
AGTGTGCGCTTCTCCTGAATTGTCAAATGAGCCGACGATGTATTCCAAAGGCGGAGGCCACTCCAC  
GTTCTGTACGTTGGGGATTGGGATATGCATTTCTTAGACCTGCTATTATACGCGTATAAACGCC  
CGTCGAGGTCGCGTTACTAATGGTGAAGTGATACCACACACCTAACGTCCAGCAGTATTTAGATAC  
AAGATATTTGAGAACTCATTAACCTCTGCTGGTCAGGGATGCTTCCACTGGACTCTAAGACTGTTTG  
ATCAAGGTGGCCTATAGTTACGAATAGCTCTGTAAAGAGCTTCGGATGGCCAGATTTATTAGGTAC  
ACCATAGGACCAGTGAACATATAACCGGACATCGGTAAGTGAATGCCACGATCTAGGGTGTGAGC  
GCCTAGGTGCTTTCACCAGGTCTGGGAGAGCCTGCCCTTCGTAGTCAGAACCCTCAGACTTAGTCC  
GATCGCCAAGTAAACATGACGTAGCCCCGCCGAAACGTTATATAGGCTAGAAGTATATGAAGGTTA  
AAGGGTTCCCGGCACTGCCGAGTCAATTCCTCCTATTTTTCAAGAGGCTGAAGACAGGAACCTGGT  
TTGTAGATGGTCGACTAGCTTTTAAACTGAACTACCAGCTAGGAGGTTTAGCGTACGATAAAATTC  
GATTCCGGTTTTCTCAAGTTGAGCTCCCCTGACAGTGGTGCCCTCGGGACACAATACGGCAATCTGTG  
ATTACAGGGTCCAACACAGCAACCAGACATGCTAGTAAGATTAATATATCAGAGCGGGGGGCACG  
CAGCCAGCCTTCCCCAGTAACGACGTTTCAGGCCCACTTCGCTTTAGTACGGAGTCGTCTGACTTC  
TGAAAATAGAGTAGGCGAATCGAAATCCCACCAAGACGTGCCCGGGCTACAGCCAGAAATGGGT  
GGGGCGGCCGACTTGAGGCACATGTTATCGCTATGAGTACCGAAGATGAGAGGATGACATACTTA  
ATTGAGTGGGTGACGGGCCATGGTAGGTCATAGACAAATTCCTAATTG

> Curlcake\_CC3 (2595)

ATCATAATTAATACGACTCACTATAGGGAGACGCAGAGTTAGTGGCGCTGGCATGTGGTAACCAAA  
ACGGTCGTGATGATGCGTTCTCTTCCGAATTTGTCCTCATAACAGAGGGAGCTAACCTTATTTCCAG  
TCTTAAGCGAGACTCGCAAGAAGGCATCGTTGCACACTAGATTGATTCAATGCAAAAAGCAGACGAA  
AGGATAAGAGTGTCTTTCTATATTGCATCATGCCGTCTTCGAATGATCGGCTAATCTACACATAGC  
CGGCCGCGCCAGTTGTCTCTCTGCCAAACGATTATGTAGGGCTCTCGGCAGGATCACTTATCTGAG  
ACGCGAAGTTCCATAATTTTAGGATTCGACGCAATTGGTACGCACGGGGTTTTGAATGTAACGTGTC  
CGGACTGGTGGAGTGAGTTGCGTCAGTCGCACAAGGGCGCGGACCTTTTTGTTTTCTTTAACGGCG  
TCTACTATGGCGTGACCCCTTAGCCTAAACCATGCGCCCATGTCAGCGCTCTTGTGTGGGCAACGG  
ACGCCGCCTCTACGCCTTACAACAGTTCAGCCGTACATAACAGCTGGAACGGGTACCTATGTTTAA  
GTAGTAGCTATCCAGGACTTTCGCCTGTGCAAGCGCATTGAACTTGTGCAACTTCAGATAACCCC  
GTGGCAGTGCCGGAACTGGCGACTGCGCGCACTCAACATTTGTTGTAAGTGCACGTACCAATGAACC  
GTGAAAGTACAGTCTGGGTACCCCAACGCTTGTAAAGGAAACCGACCACGGATCGAGTTCTTGAT  
AATACTGTGTTCTAGAGGTGTATCTTCAAAGAAAGACCATCCAATAGGGAAAGCTTGCTTATGACT

CAGTACTCCGCGGGATCTGGACCCTACATGGATGTGACTTCCTAGCGCGTGTCCACCGCGGGTTA  
GAGCATTAGAAAAAAGCTCGTGC GGCGGATTTGCAGTCACATCTGCTTGGTTATTTCGGCGCAGTTTA  
CTCACGGTTCTGCGGATAGTCCGGTTGCCATCTATCGTCATCTCCAAGGCCGATTGCGGCATTCGTC  
CCATTTGGGCGTTGATGGAGACCCATCGCATGGCTGCAGCTTAAAAACAACGGAGGATGATGCCGT  
AGGCTGTAGAATGCAAGCGCGAGCGATCGTGATCGCTACCGATCCAGTCTTCCATAGTTGGATTCT  
GCTAGTAGTAGCGTAGCGGATAATATGCGGCACGTGCAGCGTGGGCGTGAAAATCATCGAGGATGT  
GTGGATCTAGTTGGGACGTTGACTCCAGCTTATGAGAGGAATATTAGTAGCAATAAAGCGCGCGCG  
GGCAACCGGAACAAGGCCCTGCCGTGGTTCGTATCGAGTCCAGGGGGTACGGACTGAGTGC GGTTAAG  
AACTGTCGTCTTAACCACGTATCTCCTCCTAGATCCTATTTTGTAAATTAGTGATTGCGCTACGGA  
CCCTTACAACCTGAAAGAGGTGTTAGGGATATGAGATAATCGAACTGATCTCGGGCGTCCCGCTAG  
CCCGGTTTTCGTACCGGGTTTGTGACTTATGTCCATTGTACTTCAACGGTATCCCACTACGACGTA  
GCGACATCTGTTTGGTATGGCATCACTTGATCCAGCTGGTTCTGGGTATGCTCGACTCCGAAATGT  
TGACTGGGAATGAATGGTTTAGTAGGTTTGTCTGCGAACCAGATGGCTTGCAAGCACTGCGCAGC  
CGAAGACAATGTACCGTAGACAGACTGACGCACACCAAAGATTTTGCTCACTCGTGGCTTTGAATT  
CGCGAGGACCGGGTAACAGCGGGACGGAGGCGACGGGCCCTGTGACGACGAGCTGCCGACTAAGG  
GCTCACTTTACTTTTCAGGGACTCGATAATGGTTCCTTAAGCGTCTAAGTAGCCCGTACAGTCTGC  
GCCCTTGCTCCACTTGGTTTCTGGATGCCCTTTACGCGGGACGTCCAGATGCCACTCGGTGACGAA  
GAGTTTGGCGAATGACATACGTTGCGTTTGATTAAGGCATCGCTCGCTTGTCTCAGTGCTGAAGGA  
CCTACCACCCTCAAGATCTCCTAATACACAAGACTCAGCGCAAAGGTCCGGTTGCTGCTCCCTTT  
CACCCGGTCCCCTCGTGGCATAAGGTTGTGACCGCCCTTGGTTTAATAATGGTCGCCACGTGAGC  
TTCTACCTTCCCCGAGAAATGGGCTAACCTAGCTGATACATCGCTGGGAGCGGGCTGCCGAGAAAC  
TAAATCAGGGTTCATGGTGTCCGATTTGAAATCCGTGCTCCCTTAGCCTGCGGGAACGACCCGTAA  
TGGCCGTTCTGGAGTTAGTTAACCAGACCAGCCGTGCGACTAATTTGCTCGCCGTTGACATTATGC  
AGAGAACAGAGGGCAGTACGCCAGGAATTGCGCCCGTCAACTTTTGAGCAATAATATGCCTACCTT  
ATTATAGTCTAACAGAAGTACCTAGCGTGGTGGCAGACGGCCGATAGGCCTGTAAAGGCCATGGAG  
GCAGGTGTACCATCTACGGGAAGTATACGTTTCGCGGAGAATACAATCTTAAATTTTCGTGGGGAAT  
ATCACATGGAACGTGTCACCATAAGCCATGGACTGTCCATGTCTATTAG

> Curlcake\_CC4 (2709bp)

ATCATAATTAATACGACTCACTATAGGGAGACCGAGACTCTCGCCCCCTCGAAGCGATCCACCCCGC  
ATCCTAAACCCAGTCAAACCTCCTGGACCGCGCTCCCTTGAGACTAGGCGATGCTCCCTCGCCGTGG  
TGTTTTCTCTAGCGGTATAGCGCTTCTGTCTTCCCTATGGGCCGACTAGAATGACTGTCATCACTGG  
CATGGCATCAAGGGCCAACCTGCGTGGTCTGATTAGCTTGGTTAGGGGCTTGCCGATGTATTTAGC  
GCGCGTTTTCGAAACAGCGTTTTCAACATTGGCCATAGCTACCTACGAATCCCTACGATTGATACAC  
GGTCGGGACAAATGATCCGACCAAGGTGCCTCACTGGTGGGAAGTCTAGATTTCATCCGTGGGACAT  
CGGACAGTCCCTCCGTTATGCGAACCTATGACTCCACCCCAAGGGCTAAACAAAGACATTTCCCGT  
ACGCGAGTAGAGGGAGCCTTAACCGCAGTGGGATGCTAGGATCGGCTAAGGGTTTTCTCCTAATAGG  
CGGGAGTTTTCTTTCAATGAATACATTGACTCCTCACCTGCGTAAGTTGCGAACCTGACGCTTGCCT  
GATAAATCCCAGGTTTGAACGCTAGGAGACGAGGCTGCTGCAGGCGGCTGCAGTTGAAACCATGG  
ATAAATTGCGCCACCGGGCTACTTAATGCCTGCGCTCCAGCCCTTTGAGTTTTTTGCGCGCGATCCA  
GTAGAATCCTCCCCGTGGAATTAGGCCTGTGGCGCGCGGTGCACCGAGAAATTAACCTGTGGCTC  
ACAACGGCTAGGTTTTTTCTGGAGCATAGCAGATTGCCTCATGTCCATCGGGCATACTGGTGATTGT  
CCCAGCGTCCCTCAATTTTTTTTAACGCTAAGCGAGTAATGCCATCGTGGCGAGTGAATGTCGGAGGT  
GGAACACTAACTAGGTTAGTGGCCGGCTCCCGGCCAATTCGGACATGCTGTAACGTTAAGATTAG  
TAAGACAGCTGTCGTTCTAGCACATCGGCAAGGTTATAGTTTTTTCGGTTGAATGCTCACGTCCCTA  
AGCGGCAGGAATAGTATAGCTTTGGGCTCTTCATGCGGAGATCACCTCATTCTGCTTCTAACTCAG

GGGCCTACCACGGTACACCGCCACATGTCGAGACTTAGTCTTTTTGACGGCGGAACATCTCTCAGG  
CGTTCCAATCGGGCGATTAGAGCACCGAGCGTTACTTAGGATGGGTAAACATTTGTATGACTAAGAT  
CACTTGAAATAAATAACAAGCGGGTACGTTTCGAGACGAAACGTGTACATCAGGTCACGTCGTGCCGA  
AGCGTACCCTTCGTCTGATGTGCAACACTACAAGGTCTGCCGGAGCCTAAGTTAGTGCTAGACA  
AGCCATGCGCCGATAACTAAAGCAACGGTTCGGTTTCCTCCAGTCACGTTCTACGTTACTCAGGATT  
TAGCATAGCCTAGAGACAGCAGCGAGTAGTATAATACAGCGTCGGCCGACCCCAGCTAAGGACCGT  
CTTCTTCGATATATGGCGCCCCAAGCTTCTGAACAGAGGGGATCTCGCTCGCCCCATATATGTTCTG  
GTACTTACTAAACGAAAAGACAGGGTTTTTGGAGTCAAGCCTAAACTGGTGCAATGACCCCTAGCT  
ACTGAGGCCCTGACATTGGTTTTGTAGAAGTGTCTGGGTGTACCGTCCACAGGTACAGCAAATCACG  
TCACTTGAGAGCGGTCCCGTGCTGTGTTACGGCACAATAGGCACCTTTCGTTCAAAGCATTGAGAG  
ACGTTCCCCGAGGCGACCGGGTACGCAGAAGAGGTTCGGTATTTCGCAGCCAAAGCATAACCCGGTC  
CTCCTCAGAACAGCAGGACTCAAGCATAGGGACAGTGTAGCCAGCCCCAAGAAGGCAGCGGGCATT  
GCCGACCATCTTCCCTATAATGACAAGACCTTTCAGAGTGGACGTCTACTATGTCTTGGACTGCAC  
GGGTGTCCTACGCATCGCGTGGGTCCAAGTCCCATTAGCAACTTCTCTCCCGTCCGGTACAATGTTA  
CAGTTAAGCAGCGCCTCTCAATCGAGAGGCTGCACGGGAGCTCGAGAGGCGGTATCGAGGGGGTAG  
GCCGTAANAATCGCTGACTCAAACGACTATAGGAGGCGTGTGTCATGTTTAATTAAGCCATCGTCC  
AATTTTCATAGCTTAAGCTAACCCGGCCACCTTGAAGAAAAACAATTCCTTACGAATGTGGCACAC  
TGTTCCATAGAGACAGGGGGGAGTTCCTCCATAAATCACTGTTTCGTATCCGAGGTCACTCGAATG  
GAGTGTACACTAAGCTTACGAGGGTGTACTGCACGCAATAAGTAACATAGCCTCCAATGTTGGATT  
GTGTTCTACCATGGTGTGGTATCAGTCGCTGCGCTGAGTGAGTCAAGAAATCGGGAGGTAAGTTTA  
GCGAAGTAAGTATTGCGCGTAGTCGACCCGGATGCCACAATCATCCATCGACGACCCCTCTTTTA  
CTTTATATCCTTGCCGTAGGCATGGTGAAGCCATTAGCGGGTAATCACCTCTTAGTCCATCTCGC  
GCCATCGAATTCATTATACTCCGCCTTGGAGACTTACATTAGCAGTCTACGCTCTCGTTGCGCGG  
TCCACTCACTACTATCTGACCACTCGAAACATCGAACCTGCGGGTACACTGGTTCAGCCAAACAGG  
ATGCCGGACAGACAACCGAACAAGAGCATGTAGG
